Shu et al

1

2 **Genetic Rescue of Fragile X Syndrome Links FMRP Deficiency to Codon Optimality-**

3 **Dependent RNA Destabilization**

4

5

6

7 Huan Shu<sup>1</sup>, Elisa Donnard<sup>2</sup>, Botao Liu<sup>1</sup>, and Joel D. Richter<sup>1</sup>

8

9 <sup>1</sup>Program in Molecular Medicine

10 <sup>2</sup>Bioinformatics and Integrative Biology

11 University of Massachusetts Medical School

12 Worcester, MA 01605

13

14

Shu et al

## 15 **Abstract**

16 Fragile X syndrome (FXS) is caused by inactivation of *FMR1* gene and loss of its encoded  
17 product the RNA binding protein FMRP, which generally represses translation of its target  
18 transcripts in the brain. In mouse models of FXS (i.e., *Fmr1* knockout animals; *Fmr1* KO),  
19 deletion of *Cpeb1*, which encodes a translational activator, mitigates nearly all  
20 pathophysiologies associated with the disorder. Here we reveal unexpected wide-spread dys-  
21 regulation of RNA abundance in *Fmr1* KO brain cortex and its rescue to normal levels in  
22 *Fmr1/Cpeb1* double KO mice. Alteration and restoration of RNA levels are the dominant  
23 molecular events that drive the observed dys-regulation and rescue of translation as measured  
24 by whole transcriptome ribosome occupancy in the brain. The RNAs down-regulated and  
25 rescued in these animal models are highly enriched for FMRP binding targets and have an  
26 optimal codon bias that would predict their stability in wild type and possible instability in FMRP  
27 knock-out brain. Indeed, whole transcriptome analysis of RNA metabolic rates demonstrates a  
28 codon optimality-dependent elevation of RNA destruction in FMRP knock-out cortical neurons.  
29 This elevated RNA destruction leads to a massive reshuffling of the identities of stabilizing  
30 versus destabilizing codons in neurons upon loss of FMRP. Our results show a widespread  
31 RNA instability in FXS, which results from the uncoupling of codon optimality, ribosome  
32 occupancy, and RNA degradation mechanisms. Re-establishment of the linkage among these  
33 events is likely required by the genetic rescue of the disorder.

## 34 **Introduction**

35 FXS is the most common form of inherited intellectual disability that is caused by a single gene  
36 mutation<sup>1</sup>. In addition to mild to severe intellectual disability, individuals with FXS often have  
37 increased susceptibility to seizures, autism-like behaviors, developmental delays, among other  
38 symptoms<sup>1</sup>. FXS is caused by the expansion of a CGG trinucleotide repeat in the 5'UTR of

Shu et al

39 *FMR1*, which results in transcriptional silencing of the gene and subsequent loss of its protein  
40 product, the fragile X mental retardation protein (FMRP)<sup>2</sup>. In the absence of FMRP, protein  
41 synthesis in the hippocampus (where most activities of FMRP have been studied) is elevated by  
42 ~20%<sup>3,4</sup>, leading to the general hypothesis that this protein represses translation, possibly in  
43 dendritic spines as well as other regions of neurons. Stimulation of post-synaptic metabotropic  
44 glutamate receptors (mGluRs) results in a form of synaptic plasticity known as long-term  
45 depression (mGluR-LTD), which while normally protein synthesis-dependent, becomes protein-  
46 synthesis independent in the absence of FMRP. This causes aberrant synaptic plasticity (i.e.,  
47 exaggerated LTD) and impaired learning and memory<sup>5</sup>. In mouse brain, FMRP binds mostly to  
48 coding regions of ~850 to 1000 mRNAs<sup>6,7</sup>, and co-sediments with polyribosomes<sup>6</sup>. Because the  
49 ribosomes associated with many of these mRNAs are resistant to release by puromycin  
50 treatment and because these ribosomes translocate at faster rates in *Fmr1* KO brain compared  
51 to WT<sup>6,8</sup>, FMRP is thought to repress translation by impeding ribosome transit<sup>6</sup>.

52 Most genetic or pharmacologic rescue paradigms of FXS in mouse models display re-  
53 establishment of disrupted translational homeostasis<sup>3,4,8-10</sup>. We have previously shown that  
54 depletion of CPEB1, which co-localizes and co-immunoprecipitates with FMRP and activates  
55 translation in response to synaptic stimulation<sup>11</sup>, mitigates nearly all pathophysiologies  
56 associated with FXS in *Fmr1/Cpeb1* double knockout (dKO) mice, including the exaggerated  
57 mGluR-LTD and elevated protein synthesis<sup>8</sup>. However, the identities of the mRNAs whose  
58 translation is disrupted in the absence of FMRP but is restored in the dKO is unknown. Here, we  
59 have used ribosome profiling and RNA-seq to investigate the mRNAs whose expression is dys-  
60 regulated in the *Fmr1* KO cortex and rescued in the dKO animal. To our surprise, the apparent  
61 dys-regulation and rescue of translational activity (i.e., ribosome occupancy) in our FMRP- and  
62 CPEB1-depletion “disease” and rescue paradigm is largely driven by the dys-regulation and  
63 rescue at the RNA stability level. The RNAs that are up-regulated in *Fmr1* KO cortex are

Shu et al

64 enriched for those that encode ribosomal components and translational factors, and may  
 65 partially explain the excessive protein production in the *Fmr1* KO brain. Strikingly, the down-  
 66 regulated mRNAs in the *Fmr1* KO, which are enriched for those that encode factors involved in  
 67 neuronal and synaptic functions, are highly enriched for FMRP binding targets<sup>6</sup> and have a

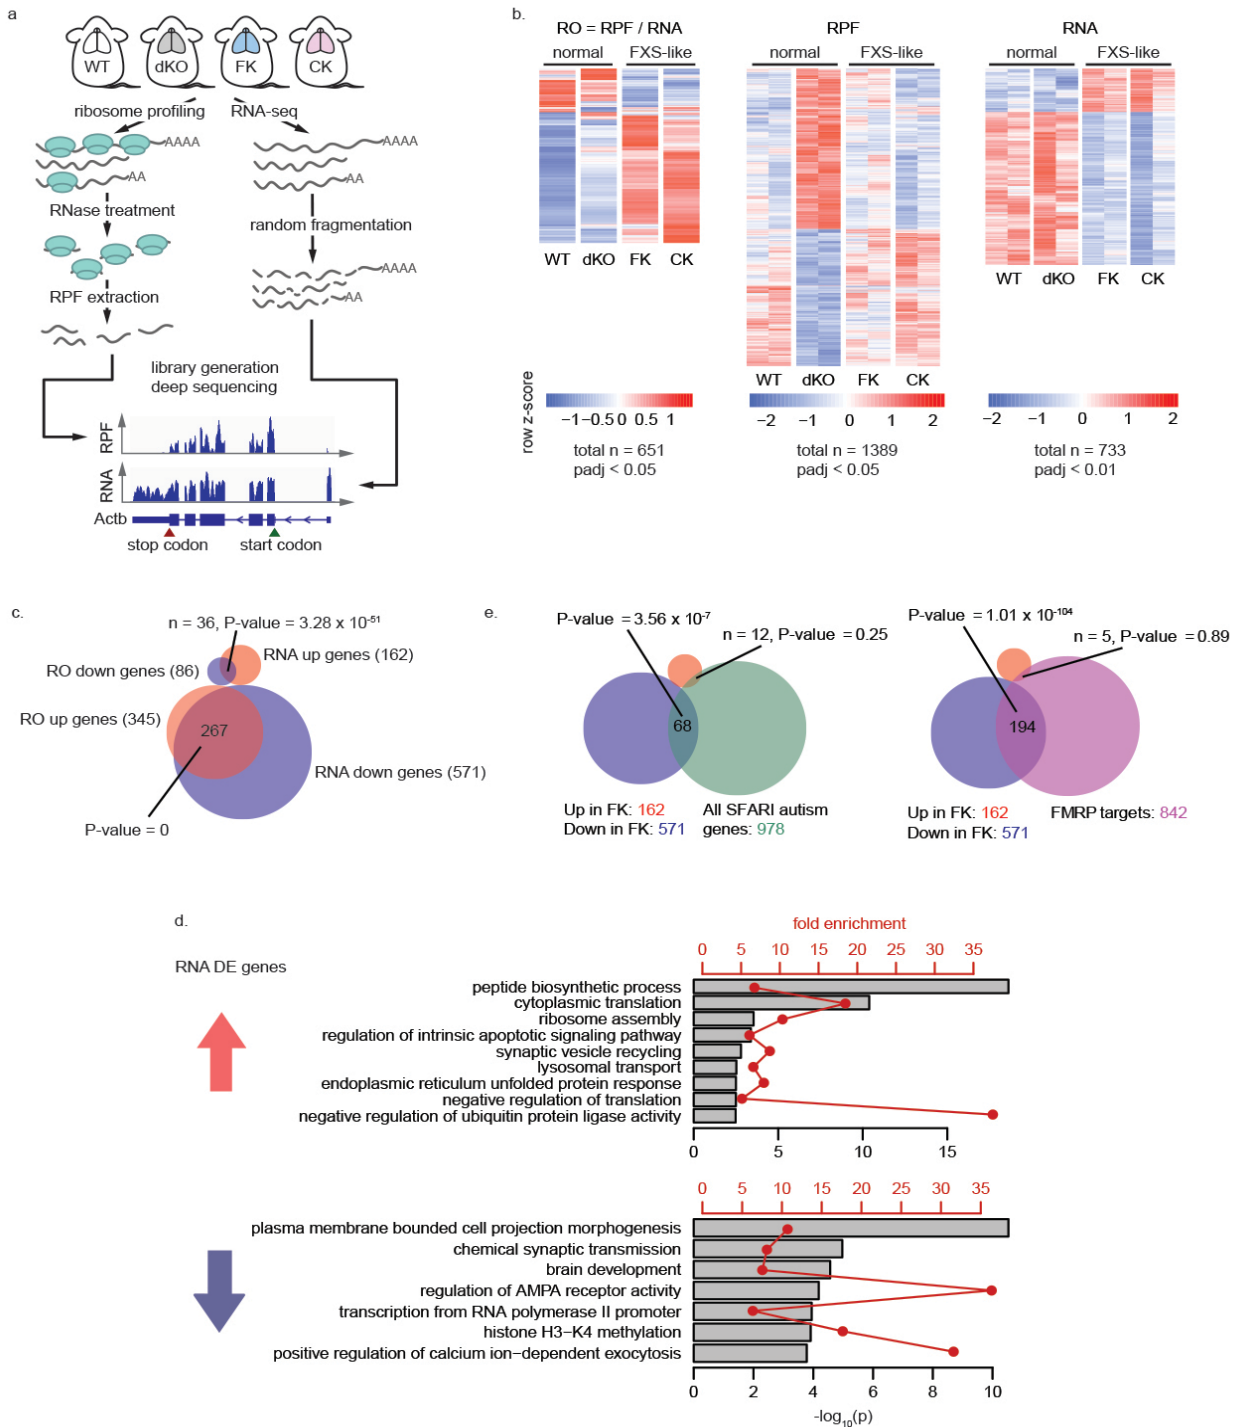

Shu et al

68 strong bias for optimal codons (i.e., codons that are favored over other synonymous codons in  
69 highly expressed mRNAs; such RNAs tend to be stable<sup>12–15</sup>), suggesting that their levels are  
70 controlled by a post-transcriptional mechanism. These observations imply that in the cortex,  
71 FMRP directly or indirectly regulates RNA stability. Indeed, RNA metabolic profiling by 5-ethynyl  
72 uridine incorporation and whole transcriptome sequencing revealed wide-spread dysregulation  
73 in RNA degradation rates in *Fmr1*-KO cortical neurons while synthesis and processing rates  
74 remained substantially unchanged. We identified ~700 mRNAs that degrade significantly faster  
75 in *Fmr1* KO cortex compared to WT; those that favor optimal codons were particularly affected.  
76 This wide-spread codon-dependent dys-regulation in RNA degradation involves a massive  
77 reshuffle of the identities of stabilizing vs destabilizing codons, which is unlinked from codon  
78 bias. These results indicate that a primary consequence of FMRP depletion from the brain  
79 transcriptome is dys-regulated mRNA stability by uncoupling codon bias from the RNA  
80 destruction machinery. This uncoupling may be a general mechanism that underlies the FXS,  
81 and restoring the RNA stability landscape could be a key to ameliorating the disorder as implied  
82 by the restored RNA levels in the dKO brain.

---

**Figure 1: RNA and not ribosome footprint levels is the dominant molecular signature in Fragile X and in a CPEB1-deficient rescue paradigm.** **a**, Illustration of the experimental pipeline of ribosome profiling and RNA-seq for WT, *Fmr1*-deficient (FK), *CPEB1*-deficient (CK), *Fmr1/CPEB1* deficient (dKO) mouse brain cortices. RPF: ribosome protected fragments. **b**, Heatmaps showing genes identified having differential ribosome occupancies (RO; left) and RPF (middle) between any two genotypes of the four genotypes noted above, and genes expressing differential steady state RNA levels between the normal and FXS-like groups (right). Heatmap heights are proportional to the numbers of differential genes identified in each comparison. Red and blue shades show high or low z-scores calculated for each gene (row) across all samples. For RPF and RNA heatmaps both replicates are plotted separately for each genotype, and for RO a statistical summary of the two replicates were calculated using Xtail<sup>17</sup> and plotted. **c**, Venn diagram showing the overlap of genes up or down regulated at the ribosome occupancy (RO) level in FK compared to WT and at the RNA level in FXS-like group compared to the normal group. Numbers of genes in each group and in each overlap as well as p-values of enrichment (hypergeometric test, upper tail) are indicated. **d**, Representative Gene Ontology (GO) terms enriched for genes upregulated (upper) or down regulated (lower) at the RNA level in the FXS-like group. Grey bars and red point-and-lines show the  $-\log_{10}(P \text{ value})$  and fold enrichment of each of these GO terms, respectively. See **Tables S1 and S2** for full lists of enriched GO terms. **e**, Venn diagrams showing the overlap between the DE genes at the RNA level with all SFARI autism risk genes<sup>20</sup> (upper) and FMRP binding targets<sup>6</sup> (lower). Numbers of genes in each group and in each overlap as well as p-values of enrichment (hypergeometric test, upper tail) are indicated.

---

Shu et al

## 83 **Results**

### 84 **RNA dys-regulation and recovery correlate with Fragile X Syndrome and genetic rescue** 85 **in mouse models**

86 To identify mRNAs that are translationally dys-regulated in the *Fmr1*-KO mouse cortex and that  
87 are rescued in the *Fmr1-Cpeb1* dKO cortex<sup>8</sup>, we performed ribosome profiling<sup>16</sup> and RNA-seq in  
88 this brain tissue from WT, *Fmr1* and *Cpeb1* single KO as well as dKO animals (**Fig 1a**).  
89 Ribosome occupancy (translational efficiency), defined as ribosome protected fragments (RPFs)  
90 normalized to mRNA levels, is a measure of translational activity<sup>16</sup> and in this sense serves as a  
91 proxy for protein synthesis. Accumulating evidence suggests that one mechanism whereby  
92 FMRP inhibits translation is by stalling ribosome transit<sup>6,8</sup> and indeed there is a moderately (10-  
93 15%) higher rate of protein synthesis in FMRP-deficient brain<sup>3,4,9</sup>. Using Xtail<sup>17</sup>, an algorithm that  
94 tests for differential ribosome occupancies (DROs) between samples, we identified 651 genes  
95 with DROs among the four genotypes (FDR < 0.05; **Fig 1b, left**). Consistent with FMRP acting  
96 as a translation repressor, 345 out of 431 genes (80%) with DRO between *Fmr1* KO (FK) and  
97 WT were up-regulated. Importantly, 425 of these DROs were rescued in the dKO cortex.  
98 Unexpectedly, more than 50% of genes with DRO in *Cpeb1* KO (CK) (204 out of 359) also had  
99 DROs in FK, and were changed in the same direction (i.e., up or down). These molecular data  
100 are consistent with previous observations such as dendritic spine number and morphology,  
101 which are similarly aberrant in the two single KOs but rescued to normal in dKO animals. In this  
102 same vein, mGluR-LTD is enhanced in both of the single KOs but restored to WT in levels in  
103 dKO animals<sup>8</sup>. Because of the molecular similarities between WT and dKO, and between FK  
104 and CK, we henceforth refer to these two groups as “normal” and “FXS-like.”

105 To determine the underlying cause of DRO among the genotypes, we analyzed our RPF and  
106 RNA-seq data separately. Surprisingly, most RPFs were indistinguishable among FK, CK and

Shu et al

107 WT. Only 23 and 21 RPFs were significantly different ( $p_{adj} < 0.05$ ) between FK and WT and  
108 between CK and WT. Conversely, the dKO was the most different from WT with 410 and 333  
109 RPFs that were significantly higher or lower (**Fig 1b, middle**).

110 In contrast, the RNA-seq heatmap displayed a reverse mirror image of the DRO heatmap (**Fig**  
111 **S1a, Fig 1b right**). Compared to WT, the expression of 50 genes was dys-regulated in FK ( $p_{adj}$   
112  $< 0.05$ ; 10 up-regulated, 40 down-regulated), 145 in CK ( $p_{adj} < 0.05$ ; 13 up-regulated, 132  
113 down-regulated), but only 2 in dKO ( $p_{adj} < 0.05$ ; *Cpeb1* and *Fmr1*) (**Fig S1a**). The differentially  
114 expressed (DE) genes in FK and CK were largely identical. Among the 10 and 13 genes up-  
115 regulated in FK and CK, 7 overlap ( $p = 8.72 \times 10^{-25}$ , hypergeometric test, upper tail); among the  
116 40 and 132 genes down-regulated, 35 overlap ( $p = 3.91 \times 10^{-72}$ , hypergeometric test, upper tail).  
117 Because the transcriptome profiles in FK and CK are so similar as are the WT and dKO (**Fig**  
118 **S1a**), we performed an unsupervised hierarchical clustering to test for sample to sample  
119 similarities (**Fig S1b**). FK and CK formed one cluster while WT and dKO formed another,  
120 validating the “FXS-like” vs “normal” grouping at the RNA level.

121 Having validated the grouping, we tested for DE genes in the FXS-like group (FK and CK)  
122 relative to the normal group (WT and dKO). The DE genes identified between the groups are  
123 changed the same way (i.e., up or down) in the single KOs and are rescued in the dKO to WT  
124 levels. We identified 733 genes dys-regulated in the FXS-like group ( $p_{adj} < 0.01$ ), 162 (22.1%)  
125 up-regulated and 571 (77.9%) down-regulated (**Fig 1b right**). Strikingly, over 77% of the genes  
126 with up-regulated ROs in FK vs WT (267 out of 345) were significantly reduced at the RNA level  
127 in the FXS-like group ( $p$ -value = 0, hypergeometric test, upper tail). Similarly, 42% of the genes  
128 with down-regulated ROs in FK (36 out of 86) were significantly increased at the RNA level ( $p$ -  
129 value =  $3.28 \times 10^{-51}$ , hypergeometric test, upper tail) (**Fig 1c**). We conclude that the observed  
130 dys-regulation and rescue ostensibly occurring at the translational level is largely driven by dys-  
131 regulation and rescue at the RNA level.

Shu et al

132 Gene Ontology (GO) analysis shows that many up-regulated RNAs have protein synthetic  
133 functions including ribosome biogenesis, translation, and protein folding, while the down-  
134 regulated RNAs have cell projection, synaptic transmission, as well as transcription and  
135 chromatin functions (**Fig 1d; Tables S1, S2**). Several important points come from this analysis.  
136 First, the down-regulation of many mRNAs may be “buffered” or compensated at the  
137 translational level by the up-regulation of other mRNAs that promote protein synthesis. Hence  
138 this could explain the net increase in protein output in FXS brain<sup>3,4,9</sup>. Indeed, we do observe  
139 increased ribosome occupancy of these RNAs (**Fig 1c**). Buffering in FMRP-deficient cells has  
140 been observed previously<sup>18</sup>. Second, we find that FMRP regulates the levels of mRNAs that  
141 encode chromatin modifying factors, which is reminiscent to other observations showing that  
142 FMRP controls the synthesis of epigenetic regulators in young neurons, albeit at the  
143 translational level<sup>19</sup>. Third, the brain and neuron components enriched in the GO terms of the  
144 down-regulated genes reflect the neural dysfunction that occurs in FXS. Indeed, the down-  
145 regulated genes are also significantly enriched for autism genes as compiled by SFARI<sup>20</sup> (**Fig**  
146 **1e left**;  $p = 3.56 \times 10^{-7}$ , hypergeometric test, upper tail).

147 We examined whether FMRP might have a direct effect on the steady state levels of the brain  
148 transcriptome. Significantly, 199 genes out of 733 DE mRNAs are bound (i.e., by CLIP, UV  
149 Crosslink and Immunoprecipitation) by FMRP<sup>6</sup>, and 194 of these were down-regulated, which is  
150 34% of all the down-regulated genes in the FXS-like group ( $p = 1.01 \times 10^{-104}$ , hypergeometric  
151 test, upper tail; **Fig 1e right**). This result indicates that loss of FMRP may have a direct impact  
152 on the levels of a subset of the transcriptome important for the proper brain functions.

153 We found that the genes down-regulated in this study, as well as FMRP target mRNAs<sup>6</sup>, were  
154 also reduced in other studies that examined various FMRP-deficient cell and tissue types from  
155 mouse to human (**Fig S1c**). Given that this dys-regulation is widespread in other FXS  
156 paradigms and that the RNA rescue parallels phenotypic rescue<sup>8</sup>, it is axiomatic that



Shu et al

157 investigating RNA dys-regulation is fundamental to understanding and perhaps mitigating the  
158 disorder.

### 159 **Down-regulated mRNAs have a strong bias for optimal codons**

160 Because of its strong cytoplasmic localization<sup>21</sup> and likely direct control of steady state levels of  
161 its binding target, we surmised that FMRP would regulate mRNA stability<sup>22</sup>. How FMRP could  
162 stabilize target RNAs is suggested by its role in stalling ribosomes during translation  
163 elongation<sup>6,8,23</sup> (**Fig 2a**). In yeast, Dhh1p (DDX6) destabilizes mRNAs with low codon optimality  
164 by sensing their slow ribosome decoding rate<sup>24</sup>. Codon optimality, a measure of the balance  
165 between the demand and supply of charged tRNAs<sup>25</sup>, is a major determinant of mRNA stability  
166 from yeast to vertebrates<sup>12-15,24,26</sup>. Generally, mRNAs with more optimal codons (presumably  
167 with faster decoding rates) are more stable than mRNAs using less optimal codons, connecting  
168 translation regulation to mRNA stability. Consequently, we calculated the codon Adaptation  
169 Index (cAI)<sup>27</sup> from our WT mouse cortex transcriptome data, which describes the codon usage  
170 bias among synonymous codons for the highly expressed genes. We then derived the  
171 geometric mean of the cAI of each codon in each gene, which is referred to as the gene cAI  
172 score (see Materials and Methods). We considered the codon cAI score as a proxy of codon  
173 optimality and the gene cAI score as a predictor of mRNA stability in WT mouse cortex; high  
174 gene cAI scores predict stable mRNAs. In WT cortex, the transcripts have gene cAI score  
175 ranging from 0.62(*Gm14431*) to 0.95 (*Rpl41*) ( $0.77 \pm 0.04$ , mean  $\pm$  S.D.).

176 Surprisingly, the RNA down-regulated genes (**Fig 2b**, blue) were significantly more optimal than  
177 the overall transcriptome ( $p = 1.51 \times 10^{-92}$ , Wilcoxon test, two tail), and the RNA up-regulated  
178 genes (red, **Fig 2b**) were significantly less optimal ( $p = 5.80 \times 10^{-17}$ , Wilcoxon test, two tail).  
179 Indeed, the down-regulated genes were among the most optimal (gene cAI of  $0.8 \pm 0.03$ , mean  
180  $\pm$  S.D.) in the transcriptome, while the up-regulated genes among the least optimal (cAI  $0.74 \pm$   
181  $0.04$ , mean  $\pm$  S.D.) (**Fig S2a**, left). These cAI scores of the DE genes are not mere reflections of

Shu et al

182 their transcript levels (**Fig S2a**, right); both gene groups were highly expressed. These values  
183 predict that the mRNAs down-regulated in FK cortex would be among the most stable in the WT  
184 cortex, while the up-regulated mRNAs the least stable.

185 We grouped the detectable  
186 transcriptome into 10 equal  
187 sized bins of increasing gene  
188 cAI score and examined  
189 whether there was a global  
190 correlation with the change of  
191 the mRNAs in FK relative to WT  
192 for each bin (**Fig 2c**, left). We  
193 observed a global depletion of  
194 high relative to low cAI score  
195 RNAs upon loss of FMRP (**Fig**  
196 **2c**, left). Globally, the log<sub>2</sub>FC  
197 (log<sub>2</sub> Fold Change) of RNA in  
198 the FXS-like group relative to  
199 the normal group has a strong  
200 negatively correlation with gene

201 cAI scores (**Fig S2b**, left; Pearson's correlation coefficient = -0.34). Other transcript features that  
202 are often associated with RNA stability regulation<sup>28</sup>, including coding sequencing (CDS) length,  
203 5' and 3' UTR length, also correlated with mRNA level changes albeit not as strongly, except for  
204 coding sequence GC content (**Fig S2b**), which is a known confounding factor with codon  
205 optimality<sup>29</sup>. Given that FMRP target mRNAs strongly overlap with the down-regulated genes  
206 (**Fig 1d**), they are, not surprisingly, reduced in all cAI bins. However, the FMRP targets with

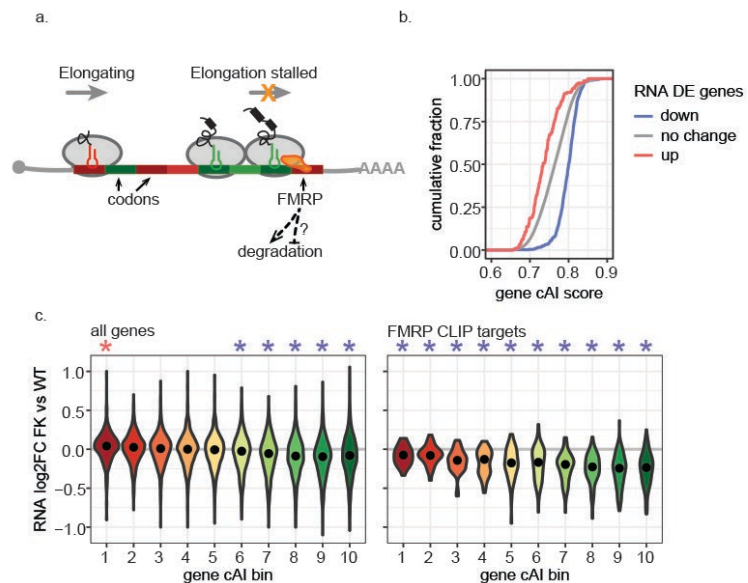

**Figure 2: RNA depletion upon loss of FMRP is a function of codon optimality.** **a**, Illustration of the links between FMRP, ribosomes, mRNA and codons. **b**, ECDF (empirical cumulative distribution function) plot of gene cAI scores for DE genes at the RNA level in the FXS-like group. **c**, All detectable protein coding genes were grouped into 10 equal bins based on their gene cAI scores. Bin 1 contains genes with gene cAI scores of the lowest quantile and bin 10 contains genes of the highest quantile. Violin plots show the RNA log<sub>2</sub>FoldChange (log<sub>2</sub>FC) in FK relative to WT of each bin for all expressed genes (left) and for only the FMRP CLIP targets<sup>6</sup> (right). The point in each violin denotes the median of the bin. Star indicates the median of the bin being greater (red) or less (blue) than 0 with a p-value < 0.01 (Wilcoxon test, one tail).

Shu et al

207 higher cAI scores are even more reduced than those with lower cAI scores (**Fig 2c**, right; **Fig**  
208 **S2c**). These results show that loss of FMRP in mouse cortex leads to depletion of its target  
209 mRNAs as well as mRNAs showing higher codon optimality. These results also predict a global  
210 trend of destabilization of FMRP target mRNAs as well as stable mRNAs in FK brain cortex.

### 211 **RNA metabolism profiling reveals major disruption in RNA stability in FMRP-deficient** 212 **neurons**

213 To determine whether loss of FMRP destabilizes mRNA, we incubated WT and FK mouse  
214 cortical neurons (14 DIV) with 5-ethynyl uridine (5EU) for 0 (i.e., unlabeled control, or “unlab”),  
215 20 (library A), or 60 min (library B), after which the RNA was “clicked” to biotin and purified by  
216 streptavidin chromatography. The RNA was mixed with 5EU-labeled fly RNA and unlabeled  
217 yeast RNA as a control and sequenced together with total unenriched RNAs as input samples  
218 (**Fig 3a**). The spike-in RNAs for the libraries were used as quality control measures, showing  
219 that the WT and FK libraries were of equal quality (**Fig S3a-c**). After filtering (**Fig S3d**), we  
220 calculated RNA metabolism rates (synthesis, processing and degradation rates) by comparing  
221 nascent and mature RNA concentrations in the 5EU-labeled and input total RNA libraries using  
222 INSPEcT<sup>30,31</sup>. We obtained metabolism rate information for 8590 RNAs, which include 412  
223 FMRP target mRNAs. The rates follow lognormal distributions with medians of 1.12 and 1.04  
224 RPKM/hr, 6.84 and 6.60 hr<sup>-1</sup>, and 0.13 and 0.14 hr<sup>-1</sup> for synthesis, processing, and degradation  
225 for libraries A and B, respectively (**Fig 3b**), demonstrating the reproducibility of the assay.

226 We calculated Spearman’s correlation coefficients for all three metabolism rates per genotypes  
227 for both libraries (**Fig 3c**). For synthesis, processing, and degradation rates, we observed  
228 decreasing correlation coefficients between WT and FK. For synthesis rates, WT and FK cluster  
229 together for the same labeling parameter (library A or B), indicating that there is little genotype  
230 difference. For libraries A and B, the correlation coefficients were 0.97 and 0.88 between WT  
231 and FK, again demonstrating that the synthesis rates between the 2 genotypes are similar. For

Shu et al

232 processing rates, the two genotypes were also similar despite slightly lower Spearman's  
233 correlation coefficients between WT and FK (0.79 and 0.61 for libraries A and B). Strikingly, the  
234 correlation coefficients of degradation rates between WT and FK were substantially lower (0.22  
235 and 0.36 for libraries A and B), indicating that there is a major difference in degradation between  
236 genotypes. The Spearman's correlation coefficients between libraries A and B for each  
237 genotype (0.87 and 0.72, respectively) indicates high reproducibility. Therefore, the degradation  
238 rates for the four libraries are separated by genotype (**Fig 3c**), demonstrating that RNA stability  
239 in FK neurons is disrupted.

240 We determined whether the RNA DE genes identified in the FXS-like group (**Fig 1b, right**) have  
241 altered RNA degradation rates. As predicted by gene cAI scores in WT cortical tissue (**Fig 2b**)  
242 and cultured cortical neurons (**Fig S3e**), the down-regulated RNAs (blue) are among those with  
243 the lowest degradation rates, i.e., the most stable (**Fig 3d, left**). On the contrary, in FK neurons,  
244 the down-regulated RNAs degrade significantly faster than the transcriptome in general (**Fig 3d,**  
245 right;  $p = 0.00029$  and  $0.026$  for libraries A and B respectively; Wilcoxon test, one tail). The up-  
246 regulated RNAs (red) do not show a significant change in degradation rate (**Fig 3d**). Therefore,  
247 many mRNAs with optimal codons that are stable in WT cortical neurons become unstable in  
248 FK neurons.

249 To perform gene level comparisons of RNA metabolism rates, we normalized the values  
250 between libraries A and B for WT and FK (**Fig S3f**). At an adjusted p-value cut-off of 0.01, we  
251 identified no RNA with different synthesis or processing rate, but 748 RNAs with different  
252 degradation rates, of which 688 (92%) degraded faster in FK compared to WT (**Fig 3d, Fig**  
253 **S3g**). Significantly, the RNAs that degraded faster in FK were highly enriched for FMRP targets  
254 and down-regulated RNAs in the cortex (**Fig 3f**), showing that faster degradation is mostly  
255 responsible for the reduced RNA levels in FK brain. We also determined the influence of codon  
256 optimality on global mRNA degradation upon the loss of FMRP. Consistent with the high gene

Shu et al

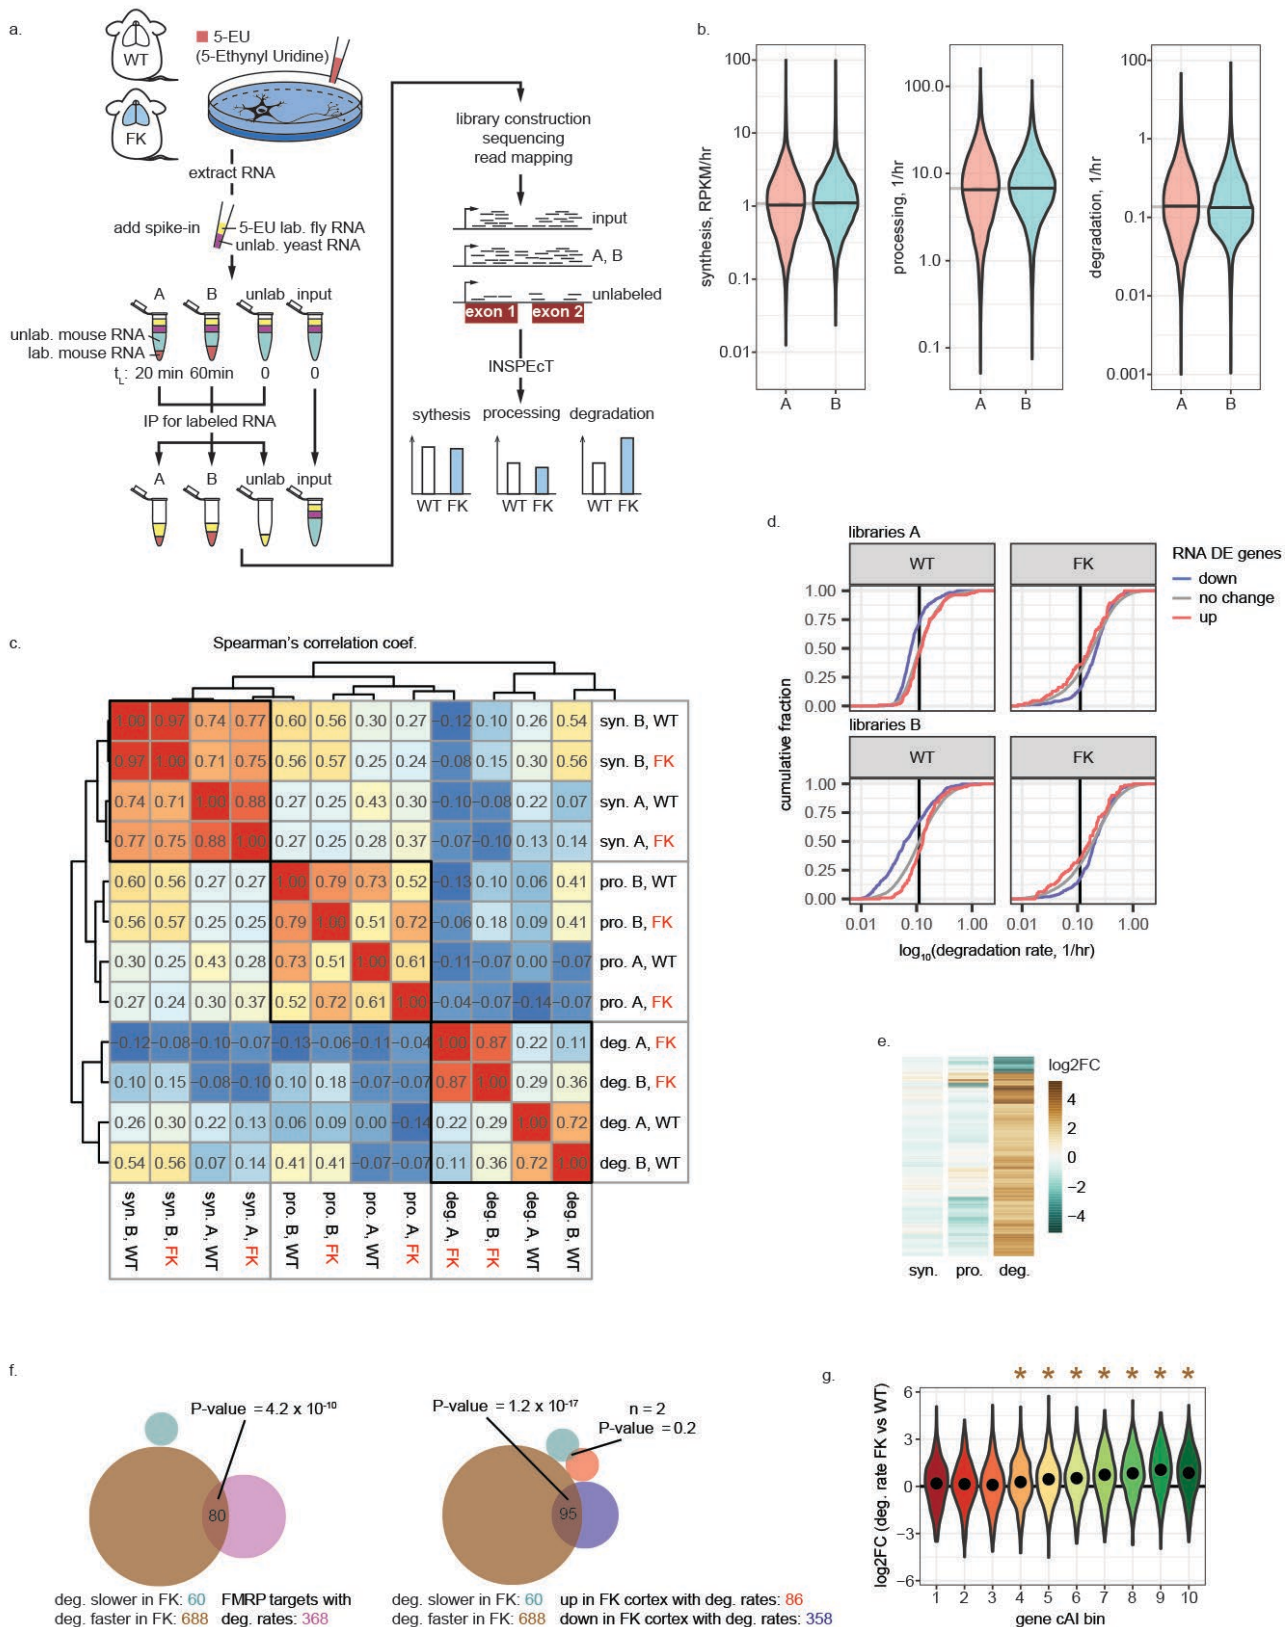

257

Shu et al

---

**Figure 3: Codon-dependent mRNA destabilization in FK neurons explains the steady state RNA depletion.** **a**, Illustration of the experimental pipeline of RNA metabolism profiling for WT and FK neurons. Unlab./lab.: unlabeled/labeled.  $t_L$ : time labeled. **b**, Violin plots for synthesis, processing and degradation rates estimated for libraries A and B. Each violin contains data from both WT and FK. Black horizontal lines denote median of each violin. Grey horizontal lines denote the median of both violins. **c**, Heatmap of Spearman's correlation coefficients between synthesis (syn.), processing (pro.), and degradation (deg.) rates estimated from RNA-seq libraries generated from WT and FK neurons labeled for 20 (A) or 60 (B) minutes. Dendrogram shows the unsupervised hierarchical clustering using their Spearman's correlation coefficients. **d**, ECDF plots of degradation rates for RNAs up- (red) or down- (blue) regulated in FXS-like group in WT or FK neurons estimated in libraries A and B. Black vertical lines denote the median degradation rates for all genes with an estimated degradation rate in WT for libraries A and B respectively. **e**, Heatmap of log2FC of synthesis (syn.), processing (pro.) and degradation (deg.) rates for genes with significant changes in any of these measures. **f**, Venn diagrams between genes with faster (brown) or slower (green) degradation rates and FMRP CLIP targets (left, pink) and genes with RNAs up- (red) or down- (blue) regulated in the FXS-like group in brain cortices (right). Numbers of genes in each group and each overlap, as well as the p-value of enrichment of each overlap, are indicated. **g**, Violin plots of log2FC of degradation rates in FK vs WT neurons for genes in each gene cAI score bins as described previously (**Fig 2c**). Brown star indicate the median of the bin greater than 0 with a p-value < 0.01 (Wilcoxon test, one tail). No bin had median less than 0.

---

258 cAI score-dependent reduction of steady state mRNA in the cortex as we observed previously  
259 (**Fig 2c, left**), there was indeed a preferential destabilization (higher degradation rate) of genes  
260 with high cAI scores (**Fig 3g, Fig S3h**).

### 261 **Disruption in RNA stability leads to massive reshuffling of stabilizing vs destabilizing** 262 **codon identities in FMRP-deficient neurons**

263 The codon-stability coefficient (CSC), which describes the link between mRNA stability and  
264 codon occurrence, has been calculated for each codon from yeast to human<sup>12-15</sup>. We  
265 determined whether this relationship is maintained in FK neurons by first calculating CSC in WT  
266 neurons. Here CSC values ranged from < -0.2 to > 0.2, which is comparable to previously  
267 reported CSC values for human cell lines and mouse embryonic stem cells (**Fig 4a**). This is  
268 unlike what has been described in fly where the neuronal CSC is attenuated relative to somatic  
269 cells<sup>13</sup>. Of the 60 non-start or -stop codons, 29 had CSCs greater than 0 (stabilizing codons)  
270 and 31 less than 0 (destabilizing codons) (**Fig 4b, upper**). Strikingly, 17 codons that are  
271 stabilizing in WT are destabilizing in FK neurons, and 21 codons changed the opposite way (**Fig**  
272 **4b, lower**). Because optimal codons are generally frequently used in highly expression genes  
273 and are associated with positive CSCs (i.e., are stabilizing codons)<sup>12-15</sup>, this reshuffling of the

Shu et al

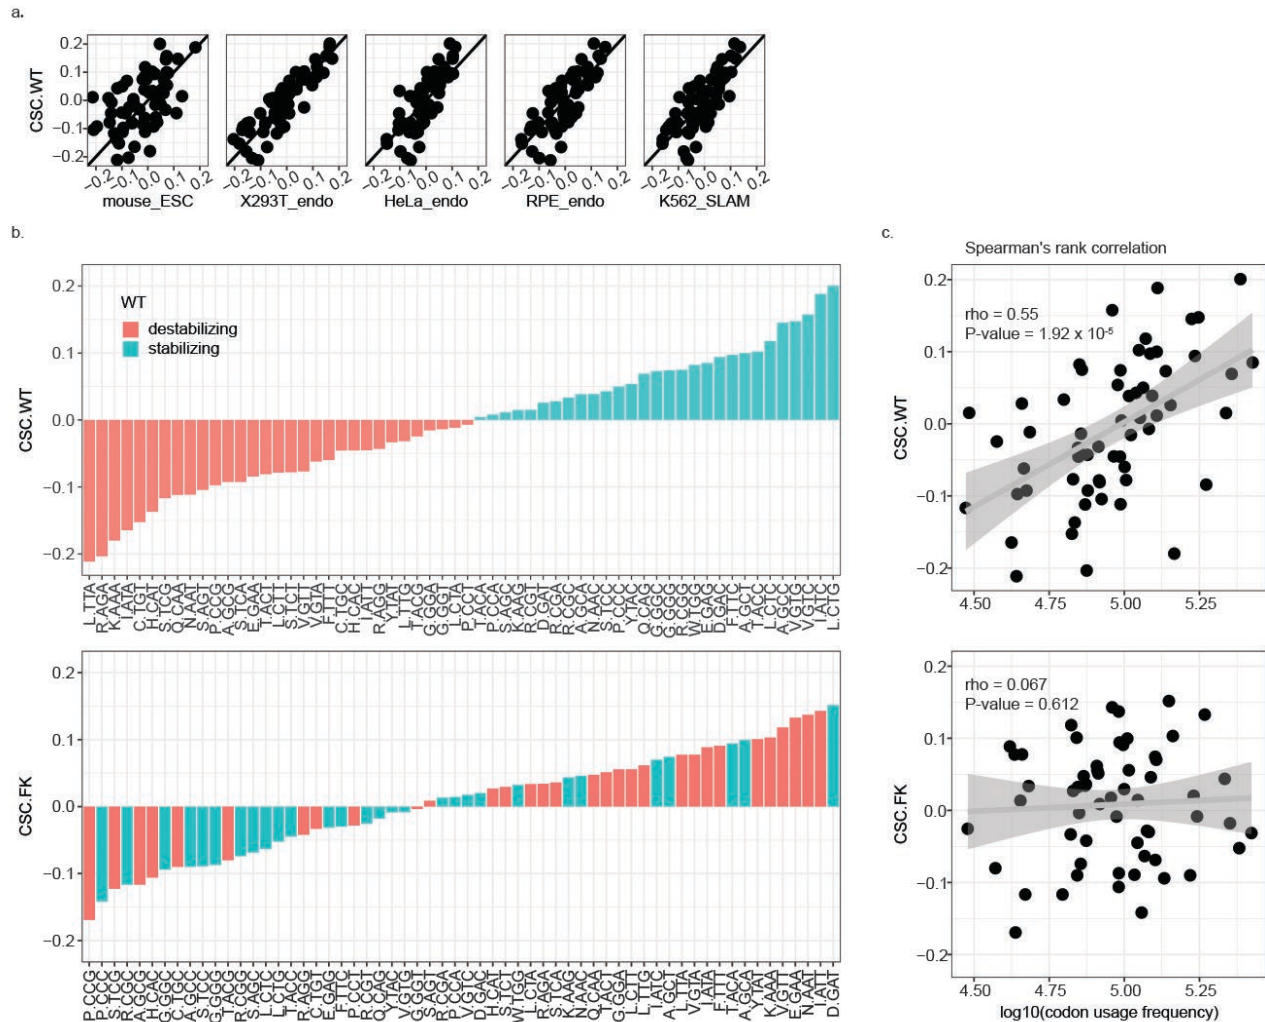

**Figure 4: Loss of FMRP leads to uncoupling of the link between codon usage bias and the identities of stabilizing and**

**destabilizing codons. a**, Scatter plots comparing CSC (codon stability coefficient) of all non-start or -stop codons in WT neurons in

this study (y axis) and that in several mouse and human cell lines shown by Wu et al<sup>15</sup>. CSCs in mouse ESC were calculated by Wu et al

et al. based on data published by Herzog et al<sup>62</sup>. CSCs in human cells lines (293T, HeLa, and RPE) measured by either blocking

transcription (“endo”) or SLAM-seq (“SLAM”) were generated by Wu et al. **b**, Bar graphs for Codon-Stability Coefficients (CSC) for

each codon as arranged from minimum to maximum in WT (upper) and FK (lower) neurons. The color of each bar indicates the codon

as stabilizing (CSC > 0, green) or destabilizing (CSC < 0, orange) in WT neurons. The amino acid for each codon is indicated. **c**,

Scatter plots and linear regressions of the CSCs as a function of log<sub>10</sub>(codon usage frequency) of the top 10% of expressed genes in

WT (upper) and FK (lower) neurons. Spearman’s rank correlation coefficients and p-values of the correlations are indicated.

274 identities of stabilizing vs destabilizing codons in FMRP-deficient neurons could reflect changes

275 in codon usage bias in highly expressed genes accordingly, i.e., the correlation between CSCs

276 and codon usage bias is maintained, or alternatively, this reshuffling could result from a

277 uncoupling of the link between codons’ stabilizing or destabilizing properties and their usage

278 bias. To examine which of the possibilities is the case, we tested Spearman’s rank correlation

Shu et al

279 between CSCs and codon usage frequencies in the top 10% expressed mRNAs in WT and FK  
280 neurons. As expected, in WT neurons there is a positive correlation ( $r = 0.55$ ,  $p$ -value =  $1.92 \times$   
281  $10^{-5}$ ). However this correlation is largely lost in FK neurons, i.e., the correlation is almost random  
282 ( $r = 0.067$ ,  $p$ -value =  $0.612$ ) (**Fig 4c**). The codon usage frequency in the top expressed genes in  
283 WT and FK neurons was largely unchanged (data not shown). These results show that the link  
284 between codons' stabilizing vs destabilizing properties and their usage bias is uncoupled in  
285 FMRP-deficient neurons.

## 286 Discussion

287 Although it is widely assumed that FXS is caused by excessive protein synthesis<sup>32</sup>, our study  
288 shows this postulate is over-simplistic. We find that steady state RNA levels are globally  
289 disrupted in the disorder, and that genetic rescue by *Cpeb1* deletion, and possibly in other  
290 rescue paradigms as well, mitigates this molecular dys-regulation. The loss of FMRP results in  
291 enhanced instability not only of its direct target substrates, but also of other mRNAs with an  
292 optimal codon bias transcriptome-wide. Our data show that RNA stability conferred by optimal  
293 codons requires trans-acting factors such as FMRP. This requirement leads to the massive  
294 reshuffling of the identities of stabilizing versus destabilizing codons in FMRP-deficient neurons.  
295 FMRP could regulate codon dependent mRNA stability either directly or indirectly. Because  
296 FMRP seems to target transcripts with a bias for optimal codons (**Fig S2c**), and FMRP CLIP  
297 targets are generally reduced in FMRP deficient cortex (**Fig 2c**, right), FMRP could be recruited  
298 to optimal codons and its binding directly stabilize the target transcripts. Alternatively, FMRP  
299 could regulate mRNA stability indirectly through translation regulation. Translation and RNA  
300 decay are closely linked; aberrant translation activity could lead to accelerated mRNA decay<sup>33</sup>.  
301 Indeed, the genes with down-regulated transcript levels in FK cortex had generally up-regulated  
302 ribosome occupancy (**Fig 1c**), a measure for translation activity. In particular, repressing



Shu et al

303 translation elongation by applying translation elongation inhibitors such as cyclohexamide<sup>34,35</sup>  
304 and sordarin<sup>35</sup>, by mutating the gene encoding eIF5A<sup>36,37</sup>, or by simulating histidine starvation by  
305 treating cells with 3-amino-1,2,4-triazole<sup>35</sup>, has been shown to stabilize mRNAs. This is  
306 reminiscent of the model where FMRP stalls translation elongation. Loss of FMRP could lead to  
307 derepression of translation elongation of its target transcripts and with it enhanced mRNA  
308 decay. However, these scenarios cannot explain the dys-regulated RNA degradation rates for  
309 mRNAs that are not FMRP CLIP targets. One possibility is that FMRP binds far more mRNAs  
310 than can be covalently crosslinked by UV irradiation. The FMRP CLIP experiments in the mouse  
311 cortex<sup>6</sup> did not use a nucleoside analog such as 4-thio uridine to enhance UV crosslinking<sup>38</sup>, nor  
312 did they use formaldehyde<sup>39</sup>, which does not rely on short-range proximity of FMRP to RNA to  
313 detect an association. Thus, the FMRP CLIP RNAs may be an underestimate of the number of  
314 transcripts bound by this protein.

315 Another possibility could be that FMRP regulates the codon-dependent stability of the  
316 transcriptome via its interaction with other protein binding partners. In yeast, nonoptimal codons  
317 induce ribosome pileup, which is recognized by Dhh1p, an RNA helicase that leads to mRNA  
318 destruction<sup>24</sup>. However, we have no evidence for ribosome pileup in mouse brain cortex.  
319 Moreover, in FMRP-deficient brain, the destabilized RNAs have increased ribosome  
320 occupancies (**Fig 1c**), not decreased. Consequently, a cause-and-effect relationship among  
321 ribosome occupancy, codon optimality, and RNA destruction as illustrated in yeast may not  
322 precisely apply to the mammalian brain. However, it is curious to note that FMRP interacts with  
323 the mammalian ortholog of Dhh1p, DDX6<sup>40,41</sup>, and that DDX6/Dhh1p CLIPs predominantly to  
324 mRNA coding regions and 3'UTRs<sup>42,43</sup>. It is worth noting the strong correlation between CDS  
325 GC content and RNA changes in the FXS-like group (**Fig S2b**), as well as the high GC content  
326 of the most destabilizing codons in FK neurons (**Fig 4b**, lower). Several factors have been found  
327 to regulate mRNA stability depending on GC content associated with codon optimality, including

Shu et al

328 DDX6<sup>44</sup> and ILF2<sup>45</sup> in human cells. It is tempting to speculate that in FMRP-deficient brain,  
329 DDX6 might mediate the destabilization of the down-regulated RNAs.

330 Lastly, we cannot exclude the possibility that loss of FMRP could impact the availability of  
331 charged tRNAs of certain anticodons. If such were the case, the balance between supply  
332 (charged tRNA) and demand (codon usage) would be lost, leading to the dys-regulation of  
333 translation elongation and mRNA decay, and therefore the uncoupling of the link between  
334 stabilizing/destabilizing codon and codon usage bias.

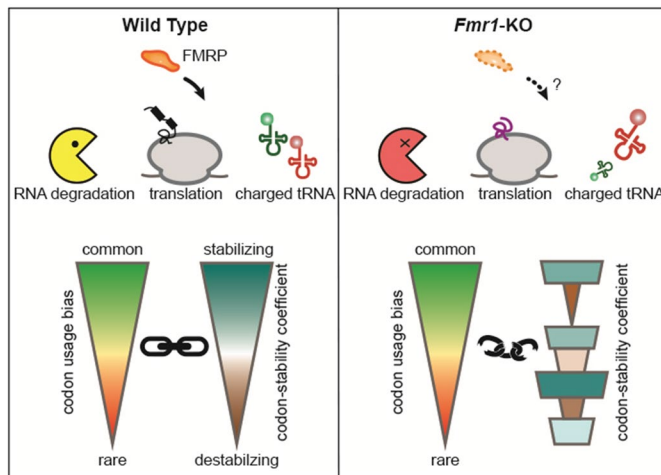

**Figure 5: Model of FMRP as the link between codon usage bias and the identities of stabilizing vs destabilizing codons in neurons.** In WT neurons (left), FMRP maintains the link between codon usage bias in the transcriptome and the rank of stabilizing and destabilizing codons. In *Fmr1*-KO neurons (right), loss of FMRP may lead to the dysregulation of one or more posttranscriptional regulatory mechanisms such as RNA degradation, translation, or availability of charged tRNAs, which in turn leads to the uncoupling of codon usage bias and codon-stability coefficients.

335 Our study establishes FMRP as a link between stabilizing/destabilizing codons and codon  
336 usage bias in the neuronal transcriptome (**Fig 5**). Given the broad similarity between the WT  
337 and dKO transcriptional profiles, we speculate that genetic rescue by CPEB1 ablation likely  
338 causes a realignment of CSC to resemble that of WT. This realignment could be a key to  
339 ameliorating the Fragile X disorder.

Shu et al

## 340 **Methods**

341 No statistical methods were used to predetermine sample size. The experiments were not  
342 randomized and the investigators were not blinded to allocation during experiments and  
343 outcome assessment.

## 344 **Animals**

345 WT, FK, CK and dKO mice were as used previously<sup>8</sup>. Specifically, FK (JAX stock# 004624) and  
346 its WT controls (JAX stock# 004828) were purchased from the Jackson Lab. CK were created  
347 in-lab<sup>46</sup>. Mice were bred as previously described<sup>8</sup>. All mice were maintained in a temperature-  
348 (25°C), humidity- (50–60%) and light-controlled (12 hr light-dark cycle) and pathogen-free  
349 environment. Animal protocols were approved for use by the University of Massachusetts  
350 Medical School Institutional Animal Care and Use Committee (IACUC).

## 351 **Ribosome profiling and RNA-seq in cortex**

352 Two mice per genotype were used for ribosome profiling and RNA-seq. The brain was rapidly  
353 removed from P28–P35 mice, rinsed in ice-cold dissection buffer (1× HBSS + 10 mM HEPES-  
354 KOH), rapidly dissected in dissection buffer ice-liquid mixture to collect cerebral cortex as  
355 described previously<sup>47</sup>. Both cortex hemispheres were homogenized in 900µl of homogenization  
356 buffer<sup>47</sup> (10 mM HEPES-KOH, pH 7.4, 150 mM KCl, 5 mM MgCl<sub>2</sub>, 0.5 mM DTT, 100 µg/ml  
357 cycloheximide and 2 µg/ml harringtonine), containing protease and phosphatase inhibitors  
358 (cOmplete, EDTA-free Protease Inhibitor Cocktail and PhosSTOP from Roche/Sigma, cat. no.  
359 11836170001 and 4906837001), in a pre-chilled 2-mL glass Dounce homogenizer, 20 strokes  
360 loose, 20 strokes tight, and centrifuged at low speed (2000 rcf 10 min 4°C) to pellet insoluble  
361 material<sup>8</sup>. Five hundred microliters of the resulted ~700µl supernatant (cytoplasmic lysate) were  
362 used for ribosome profiling, the rest for RNA-seq. For ribosome profiling, the lysate was  
363 digested by 60 U RNase T1 (Thermo Scientific, cat. no. EN0541) and 100ng RNase A (Ambion,

Shu et al

364 cat. no. AM2270) per A260 unit<sup>48</sup> for 30 min at 25°C with gentle mixing. Digestion was stopped  
365 by adding 30 µl SUPERase-In (Invitrogen, cat. no. AM2694). Digested lysate was separated by  
366 sedimentation through sucrose gradients. Monosome fractions were identified, pooled, and  
367 extracted with TRIzol LS (Invitrogen, cat. no. 10296028).

368 For RNA-seq, cytoplasmic RNA was extracted from the lysate using TRIzol LS. Ten micrograms  
369 of RNA were depleted of rRNA using Ribo-Zero Gold rRNA Removal Kit, Human/Mouse/Rat  
370 (illumina, discontinued), and fragmented by incubating with PNK buffer (NEB, cat. no. M0201S)  
371 for 10 min at 94°C. Fragmented RNA as separated on 15% urea-polyacrylamide gel, and 50-  
372 60nt fraction was collected.

373 Ribosome profiling and RNA-seq libraries were prepared following published protocols<sup>49</sup> and  
374 sequenced with Illumina NextSeq.

#### 375 **Spike-in RNA for RNA metabolism profiling**

376 *D. melanogaster* (fly) Schneider 2 (S2) cells were grown in 12 ml Schneider's insect medium  
377 (Sigma-Aldrich, cat. no. S0146) containing 10% (v/v) of Fetal Bovine Serum (FBS, Sigma-  
378 Aldrich, cat. no. F2442) at 28°C until confluent. Cells were incubated with 200 µM 5-EU for 24  
379 hr, and were washed, pelleted and snap frozen in liquid nitrogen. RNA was extracted using  
380 TRIzol.

381 *S. cerevisiae* (yeast) cells were grown in 10 ml YEP medium containing 3% glucose at 30°C  
382 until OD<sub>600 nm</sub> reaches 0.5. Cells were then pelleted and RNA was extracted using hot acidic  
383 phenol<sup>50</sup>.

#### 384 **RNA metabolism profiling with cortical neuron cultures**

385 Cortical cell suspension were obtained by dissociating cerebral cortices from E18 embryos  
386 using the Papain Dissociation System (Worthington, cat. no. LK003150). One million live cells

Shu et al

387 were plated in 5 ml complete Neurobasal culture medium (Neurobasal™ Medium (Gibco, cat.  
388 no. 21103049), 1x B-27 supplement (Gibco, cat. no. 17504044), 1x Antibiotic-Antimycotic  
389 (Gibco, cat. no. 15240096), 1x GlutaMAX (Gibco, cat. no. 35050061)) per 60 mm poly-L-lysine  
390 treated cell culture dish. Neurons were fed by half-replacing the complete Neurobasal culture  
391 medium twice per week. DIV14 neurons were incubated with 200 μM 5-EU (Click-iT™ Nascent  
392 RNA Capture Kit, Invitrogen, cat. no. C10365) for 0 (input and “unlab”), 20 (“A”), and 60 (“B”)  
393 min. Neurons were then washed with ice cold 1x PBS buffer, and RNA was extracted using  
394 TRIzol (Invitrogen, cat. no. 15596018). Five-EU labeled RNA was enriched and RNA-seq library  
395 was prepared by adapting the Coller lab (Case Western Reserve University) protocol (personal  
396 communication). Specifically, mouse neuron RNA was spiked-in with 10% (w/w) 5-EU labeled  
397 fly RNA and 10% (w/w) yeast RNA. The mixed RNA was depleted of rRNA using the Ribo-Zero  
398 Gold rRNA Removal Kit (Human/Mouse/Rat) and fragmented using NEBNext® Magnesium  
399 RNA Fragmentation Module (NEB, cat. no. E6150S) for 5 min. RNA samples for libraries unlab,  
400 A and B were biotinylated by Click-iT chemistry and pulled-down using the Click-iT™ Nascent  
401 RNA Capture Kit. The pulled-down samples, together with the input sample, were subjected to  
402 library construction the same as for ribosome profiling libraries<sup>49</sup>. Here, for the pulled-down  
403 samples, all reactions were performed directly on beads until after the reverse transcription  
404 step. Sequencing library fraction with insert size 50-200nt was collected and sequenced with  
405 Illumina NextSeq. For each WT and FK, two independent batches of neurons were prepared,  
406 and each batch resulted in one of each input, unlab, A and B libraries (**Tab S3**).

#### 407 **Differential translation and RNA expression analysis**

408 Brain cortex ribosome profiling and RNA-seq reads were processed as previously described<sup>11</sup>,  
409 which includes the following steps: 1) reads were separated based on sample barcode  
410 sequences; 2) known 3' adapter sequences and low quality bases were removed with  
411 Cutadapt<sup>51</sup> using parameters -O 2 -q 15 -a

Shu et al

412 “TGGAAATTCTCGGGTGCCAAGGAGATCGGAAGAGCGGTTTCAGCAGGAATGCCGAGACCG”; 3) reads mapped to rRNA and  
413 tRNA genes were removed using Bowtie2<sup>52</sup> with parameter -N 1; 3) remaining reads were  
414 mapped to the mm10 genome using TopHat2<sup>53</sup>; and 4) PCR duplicates were removed based on  
415 Unique Molecular Identifier sequences.

416 Uniquely mapped reads were then used as input to RSEM<sup>54</sup> for quantification of gene  
417 expression and either mapped to RefSeq (v69) mouse coding sequences (RPF) or to whole-  
418 transcriptome (RNA-seq). Genes were filtered to have a minimum of 10 TPM (transcripts per  
419 million) in at least one sample. We used log transformed TPM expression values to correct for  
420 batch effects using ComBat<sup>55</sup> (v3.18.0). Corrected values were transformed back to read counts  
421 using the expected size of each transcript informed by RSEM. Batch-corrected counts were  
422 used to identify differentially translated/expressed genes with DESeq2<sup>56</sup> (RPF and RNA) or  
423 Xtail<sup>10</sup> (ribosome occupancy, RO).

#### 424 **GO analysis**

425 GO enrichment analysis was performed using Cytoscape with the ClueGo<sup>57</sup> plug-in (v2.3.3),  
426 with genes that are expressed in the mouse cortex as the reference gene set. Specifically,  
427 biological function GO terms of levels 6-13 were tested for enrichment at adjusted p-value <  
428 0.05 (Right-sided hypergeometric test). Enriched GO terms that are similar were then fused to a  
429 group based on their Kappa score which quantifies percentage of common genes between  
430 terms. The leading group terms, which are the terms with highest significance in each group,  
431 are presented in **Fig 2c**. All enriched terms are in **Tab. S1** and **S2**.

#### 432 **Codon adaptation index (cAI)**

433 The codon adaptation index was calculated for a given sample as described by Sharp & Li (ref  
434 1987). Briefly, for each sample, a set of the top 10% expressed genes was defined using batch-  
435 corrected TPM; the relative synonymous codon usage was then calculated, dividing the

Shu et al

436 observed frequency of each codon by the frequency expected assuming all synonymous  
437 codons for a given amino acid are used equally; the codon adaptation index (cAI) is then  
438 calculated by comparing the frequency of each codon to the frequency of the most abundant (or  
439 optimal) codon for a given amino acid. All codes used to perform this analysis are available on  
440 GitHub (<https://github.com/elisadonnard/CodonOPT>).

#### 441 **RNA metabolism profiling analysis**

442 Reads generated from the RNA metabolism profiling libraries were processed as for cortical  
443 RNA-seq libraries described above, except that a mouse-fly-yeast merged genome (mm10 +  
444 dm6 + sacCer3) was used as the reference genome for reads mapping by hisat2. The mapping  
445 statistics here were used for quality control and filtering purposes (**Fig S3a-d**). Uniquely mapped  
446 reads that are depleted of rRNA, tRNA sequences and PCR duplicates were again mapped to  
447 mm10 genome with hisat2. Intron and exon read quantification, and RNA metabolism rates  
448 (synthesis, processing and degradation) estimation was performed using INSPEcT<sup>30</sup> (v1.10.0),  
449 with the degDuringPulse parameter set to TRUE. One set of libraries, which was of low  
450 complexity (**Tab S3**), was still used to confirm the global shift of degradation rates in FK  
451 neurons. This reproducible global shift allowed us to normalize WT and FK libraries separately  
452 for our gene level analysis (**Fig S3g**). Specifically, raw RNA metabolism rates estimated by  
453 INSPEcT were normalized between libraries A and B for WT and FK neurons separately using  
454 the limma package<sup>58</sup> with the “cyclicloess” method. After normalization, genes with different  
455 metabolism rates were tested using the limma package.

#### 456 **Codon-stability coefficient (CSC) analysis**

457 CSCs were calculated as previously described<sup>8,9,12,14</sup>. Specifically, a Pearson’s correlation  
458 coefficient was calculated for each of the 60 non-start and -stop codons between the  
459 frequencies of this codon in all the genes that use this codon, and the stability of these genes.

Shu et al

460 The stability of a gene ( $y$ ), which is the inverse of its degradation rate ( $x$ ), is expressed as  
461 follows:

$$y = -(\log_2 x_A + \log_2 x_B)/2$$

462 Here  $x_A$  and  $x_B$  are the normalized degradation rates from library A and B respectively. The  
463 highest expressed isoform of each gene was used to calculate the usage frequencies of each  
464 codon.

#### 465 **Quantification and statistical analysis**

466 Blinding or randomization was not used in any of the experiments. The number of independent  
467 biological replicates used for an experiment is indicated in the respective figure legends or main  
468 text. The statistical tests and P values used for the interpretation of data are mentioned in the  
469 figure legends or main text.

#### 470 **Code availability**

471 All codes used to perform cAI analysis are available on GitHub  
472 (<https://github.com/elisadonnard/CodonOPT>). Other customized R scripts for data analysis are  
473 available from the corresponding authors upon request.

#### 474 **Data availability**

475 The data supporting the findings of this study have been deposited in the Gene Expression  
476 Omnibus (GEO) repository with the accession code [GSE0000000](#). All other data are available  
477 from the corresponding authors upon reasonable request.

#### 478 **References**

- 479 1. Santoro, M. R., Bray, S. M. & Warren, S. T. Molecular Mechanisms of Fragile X Syndrome: A  
480 Twenty-Year Perspective. *Annu. Rev. Pathol. Mech. Dis.* **7**, 219–245 (2012).



Shu et al

- 481 2. Pieretti, M. *et al.* Absence of expression of the FMR-1 gene in fragile X syndrome. *Cell* **66**,  
482 817–822 (1991).
- 483 3. Dölen, G. *et al.* Correction of fragile X syndrome in mice. *Neuron* **56**, 955–962 (2007).
- 484 4. Bhattacharya, A. *et al.* Genetic Removal of p70 S6 Kinase 1 Corrects Molecular, Synaptic,  
485 and Behavioral Phenotypes in Fragile X Syndrome Mice. *Neuron* **76**, 325–337 (2012).
- 486 5. Bear, M. F., Huber, K. M. & Warren, S. T. The mGluR theory of fragile X mental retardation.  
487 *Trends Neurosci.* **27**, 370–377 (2004).
- 488 6. Darnell, J. C. *et al.* FMRP stalls ribosomal translocation on mRNAs linked to synaptic  
489 function and autism. *Cell* **146**, 247–261 (2011).
- 490 7. Maurin, T. *et al.* HITS-CLIP in various brain areas reveals new targets and new modalities of  
491 RNA binding by fragile X mental retardation protein. *Nucleic Acids Res.* (2018).  
492 doi:10.1093/nar/gky267
- 493 8. Udagawa, T. *et al.* Genetic and acute CPEB1 depletion ameliorate fragile X pathophysiology.  
494 *Nat. Med.* **19**, 1473–1477 (2013).
- 495 9. Gross, C. *et al.* Increased Expression of the PI3K Enhancer PIKE Mediates Deficits in Synaptic  
496 Plasticity and Behavior in Fragile X Syndrome. *Cell Rep.* **11**, 727–736 (2015).
- 497 10. Richter, J. D., Bassell, G. J. & Klann, E. Dysregulation and restoration of translational  
498 homeostasis in fragile X syndrome. *Nat. Rev. Neurosci.* **16**, 595–605 (2015).
- 499 11. Udagawa, T. *et al.* Bidirectional control of mRNA translation and synaptic plasticity by the  
500 cytoplasmic polyadenylation complex. *Mol. Cell* **47**, 253–266 (2012).
- 501 12. Bazzini, A. A. *et al.* Codon identity regulates mRNA stability and translation efficiency during  
502 the maternal-to-zygotic transition. *EMBO J.* **35**, 2087–2103 (2016).

Shu et al

- 503 13. Burow, D. A. *et al.* Attenuated Codon Optimality Contributes to Neural-Specific mRNA  
504 Decay in *Drosophila*. *Cell Rep.* **24**, 1704–1712 (2018).
- 505 14. Presnyak, V. *et al.* Codon Optimality Is a Major Determinant of mRNA Stability. *Cell* **160**,  
506 1111–1124 (2015).
- 507 15. Wu, Q. *et al.* Translation affects mRNA stability in a codon-dependent manner in human  
508 cells. *eLife* **8**, e45396 (2019).
- 509 16. Ingolia, N. T., Brar, G. A., Rouskin, S., McGeachy, A. M. & Weissman, J. S. The ribosome  
510 profiling strategy for monitoring translation in vivo by deep sequencing of ribosome-  
511 protected mRNA fragments. *Nat. Protoc.* **7**, 1534–1550 (2012).
- 512 17. Xiao, Z., Zou, Q., Liu, Y. & Yang, X. Genome-wide assessment of differential translations with  
513 ribosome profiling data. *Nat. Commun.* **7**, 11194 (2016).
- 514 18. Liu, B. *et al.* Regulatory discrimination of mRNAs by FMRP controls mouse adult neural stem  
515 cell differentiation. *Proc. Natl. Acad. Sci. U. S. A.* **115**, E11397–E11405 (2018).
- 516 19. Korb, E. *et al.* Excess Translation of Epigenetic Regulators Contributes to Fragile X Syndrome  
517 and Is Alleviated by Brd4 Inhibition. *Cell* (2017). doi:10.1016/j.cell.2017.07.033
- 518 20. SFARI Gene. *SFARI* (2017). Available at: <https://www.sfari.org/resource/sfari-gene/>.  
519 (Accessed: 15th November 2017)
- 520 21. Feng, Y. *et al.* Fragile X Mental Retardation Protein: Nucleocytoplasmic Shuttling and  
521 Association with Somatodendritic Ribosomes. *J. Neurosci.* **17**, 1539–1547 (1997).
- 522 22. Zalfa, F. *et al.* A new function for the fragile X mental retardation protein in regulation of  
523 PSD-95 mRNA stability. *Nat. Neurosci.* **10**, 578–587 (2007).

Shu et al

- 524 23. Chen, E., Sharma, M. R., Shi, X., Agrawal, R. K. & Joseph, S. Fragile X Mental Retardation  
525 Protein Regulates Translation by Binding Directly to the Ribosome. *Mol. Cell* **54**, 407–417  
526 (2014).
- 527 24. Radhakrishnan, A. *et al.* The DEAD-Box Protein Dhh1p Couples mRNA Decay and Translation  
528 by Monitoring Codon Optimality. *Cell* **0**, (2016).
- 529 25. Pechmann, S. & Frydman, J. Evolutionary conservation of codon optimality reveals hidden  
530 signatures of cotranslational folding. *Nat. Struct. Mol. Biol.* **20**, 237–243 (2013).
- 531 26. Mishima, Y. & Tomari, Y. Codon Usage and 3' UTR Length Determine Maternal mRNA  
532 Stability in Zebrafish. *Mol. Cell* **61**, 874–885 (2016).
- 533 27. Sharp, P. M. & Li, W. H. The codon Adaptation Index--a measure of directional synonymous  
534 codon usage bias, and its potential applications. *Nucleic Acids Res.* **15**, 1281–1295 (1987).
- 535 28. Neymotin, B., Ettorre, V. & Gresham, D. Multiple Transcript Properties Related to  
536 Translation Affect mRNA Degradation Rates in *Saccharomyces cerevisiae*. *G3*  
537 *GenesGenomesGenetics* **6**, 3475–3483 (2016).
- 538 29. Bornelöv, S., Selmi, T., Flad, S., Dietmann, S. & Frye, M. Codon usage optimization in  
539 pluripotent embryonic stem cells. *Genome Biol.* **20**, 119 (2019).
- 540 30. de Pretis, S. *et al.* INSPEcT: a computational tool to infer mRNA synthesis, processing and  
541 degradation dynamics from RNA- and 4sU-seq time course experiments. *Bioinformatics* **31**,  
542 2829–2835 (2015).
- 543 31. Mukherjee, N. *et al.* Integrative classification of human coding and noncoding genes  
544 through RNA metabolism profiles. *Nat. Struct. Mol. Biol.* **24**, 86–96 (2017).

Shu et al

- 545 32. Kelleher, R. J. & Bear, M. F. The Autistic Neuron: Troubled Translation? *Cell* **135**, 401–406  
546 (2008).
- 547 33. Roy, B. & Jacobson, A. The intimate relationships of mRNA decay and translation. *Trends*  
548 *Genet.* **29**, 691–699 (2013).
- 549 34. Beelman, C. A. & Parker, R. Differential effects of translational inhibition in cis and in trans  
550 on the decay of the unstable yeast MFA2 mRNA. *J. Biol. Chem.* **269**, 9687–9692 (1994).
- 551 35. Chan, L. Y., Mugler, C. F., Heinrich, S., Vallotton, P. & Weis, K. Non-invasive measurement of  
552 mRNA decay reveals translation initiation as the major determinant of mRNA stability. *eLife*  
553 **7**, e32536 (2018).
- 554 36. Saini, P., Eyler, D. E., Green, R. & Dever, T. E. Hypusine-containing protein eIF5A promotes  
555 translation elongation. *Nature* **459**, 118–121 (2009).
- 556 37. Zuk, D. & Jacobson, A. A single amino acid substitution in yeast eIF-5A results in mRNA  
557 stabilization. *EMBO J.* **17**, 2914–2925 (1998).
- 558 38. Hafner, M. *et al.* Transcriptome-wide Identification of RNA-Binding Protein and MicroRNA  
559 Target Sites by PAR-CLIP. *Cell* **141**, 129–141 (2010).
- 560 39. Singh, G., Ricci, E. P. & Moore, M. J. RIPit-Seq: A high-throughput approach for footprinting  
561 RNA:protein complexes. *Methods* **65**, 320–332 (2014).
- 562 40. Barbee, S. A. *et al.* Staufen- and FMRP-Containing Neuronal RNPs Are Structurally and  
563 Functionally Related to Somatic P Bodies. *Neuron* **52**, 997–1009 (2006).
- 564 41. Ayache, J. *et al.* P-body assembly requires DDX6 repression complexes rather than decay or  
565 Ataxin2/2L complexes. *Mol. Biol. Cell* **26**, 2579–2595 (2015).

Shu et al

- 566 42. Mitchell, S. F., Jain, S., She, M. & Parker, R. Global analysis of yeast mRNPs. *Nat. Struct. Mol.*  
567 *Biol.* **20**, 127–133 (2013).
- 568 43. Nostrand, E. L. V. *et al.* A Large-Scale Binding and Functional Map of Human RNA Binding  
569 Proteins. *bioRxiv* 179648 (2018). doi:10.1101/179648
- 570 44. Courel, M. *et al.* GC content shapes mRNA decay and storage in human cells. *bioRxiv*  
571 373498 (2019). doi:10.1101/373498
- 572 45. Hia, F. *et al.* Codon Bias Confers Stability to mRNAs via ILF2 in Humans. *bioRxiv* 585992  
573 (2019). doi:10.1101/585992
- 574 46. Tay, J. & Richter, J. D. Germ Cell Differentiation and Synaptonemal Complex Formation Are  
575 Disrupted in CPEB Knockout Mice. *Dev. Cell* **1**, 201–213 (2001).
- 576 47. Stefani, G., Fraser, C. E., Darnell, J. C. & Darnell, R. B. Fragile X Mental Retardation Protein Is  
577 Associated with Translating Polyribosomes in Neuronal Cells. *J. Neurosci.* **24**, 7272–7276  
578 (2004).
- 579 48. Cenik, C. *et al.* Integrative analysis of RNA, translation and protein levels reveals distinct  
580 regulatory variation across humans. *Genome Res.* gr.193342.115 (2015).  
581 doi:10.1101/gr.193342.115
- 582 49. Heyer, E. E., Ozadam, H., Ricci, E. P., Cenik, C. & Moore, M. J. An optimized kit-free method  
583 for making strand-specific deep sequencing libraries from RNA fragments. *Nucleic Acids Res.*  
584 **43**, e2–e2 (2015).
- 585 50. Collart, M. A. & Oliviero, S. Preparation of Yeast RNA. *Curr. Protoc. Mol. Biol.* **23**, 13.12.1-  
586 13.12.5 (1993).

Shu et al

- 587 51. Martin, M. Cutadapt removes adapter sequences from high-throughput sequencing reads.  
588 *EMBnet.journal* **17**, 10–12 (2011).
- 589 52. Langmead, B. & Salzberg, S. L. Fast gapped-read alignment with Bowtie 2. *Nat. Methods* **9**,  
590 357–359 (2012).
- 591 53. Kim, D. *et al.* TopHat2: accurate alignment of transcriptomes in the presence of insertions,  
592 deletions and gene fusions. *Genome Biol.* **14**, R36 (2013).
- 593 54. Li, B. & Dewey, C. N. RSEM: accurate transcript quantification from RNA-Seq data with or  
594 without a reference genome. *BMC Bioinformatics* **12**, 323 (2011).
- 595 55. Leek, J. T., Johnson, W. E., Parker, H. S., Jaffe, A. E. & Storey, J. D. The sva package for  
596 removing batch effects and other unwanted variation in high-throughput experiments.  
597 *Bioinformatics* **28**, 882–883 (2012).
- 598 56. Love, M. I., Huber, W. & Anders, S. Moderated estimation of fold change and dispersion for  
599 RNA-seq data with DESeq2. *Genome Biol.* **15**, 550 (2014).
- 600 57. Bindea, G. *et al.* ClueGO: a Cytoscape plug-in to decipher functionally grouped gene  
601 ontology and pathway annotation networks. *Bioinforma. Oxf. Engl.* **25**, 1091–1093 (2009).
- 602 58. Ritchie, M. E. *et al.* limma powers differential expression analyses for RNA-sequencing and  
603 microarray studies. *Nucleic Acids Res.* **43**, e47–e47 (2015).
- 604 59. Thomson, S. R. *et al.* Cell-Type-Specific Translation Profiling Reveals a Novel Strategy for  
605 Treating Fragile X Syndrome. *Neuron* **95**, 550-563.e5 (2017).
- 606 60. Zhang, F. *et al.* Fragile X mental retardation protein modulates the stability of its m6A-  
607 marked messenger RNA targets. *Hum. Mol. Genet.* **27**, 3936–3950 (2018).

Shu et al

- 608 61. Haenfler, J. M. *et al.* Targeted Reactivation of FMR1 Transcription in Fragile X Syndrome  
609 Embryonic Stem Cells. *Front. Mol. Neurosci.* **11**, (2018).  
610 62. Herzog, V. A. *et al.* Thiol-linked alkylation for the metabolic sequencing of RNA. *bioRxiv*  
611 177642 (2017). doi:10.1101/177642

## 612 **Acknowledgements**

613 We thank Emmiliano Ricci for sharing his experience and protocol for ribosome profiling, Mariya  
614 Ivshina for advice and help with the mouse breeding and Ruijia Wang for help with the  
615 bioinformatics. We thank Lindsay Romo for sharing her protocol for 5-EU labeling of neuron  
616 culture, and Jeff Coller (Case Western Reserve University) for Click-iT EU tagging – RNA-seq  
617 protocol. We also thank Ariel Bazzini for his very helpful discussion and input. Nathan  
618 Gioacchini and Yongjin Lee helped preparing yeast and fly spike-in RNA samples. This works  
619 was supported by the National Institutes of Health (U54HD82013); the Simons Foundation, and  
620 the Charles H. Hood Foundation (to JDR).

## 621 **Author information**

### 622 **Contributions**

623 H.S. and J.D.R. conceived the project and designed the experiments. H.S. performed most of  
624 the experiments, B.L. generated RNA-seq libraries. H.S. and E.D. performed the bioinformatic  
625 analysis with input from B.L. H.S. and J.D.R. wrote the manuscript with input from all authors.

### 626 **Corresponding authors**

627 Correspondence to Huan Shu or Joel Richter.

Shu et al

628 **Ethics declarations**

629 **Competing interests**

630 The authors declare no competing interests.



Shu et al, Supplementary Figures

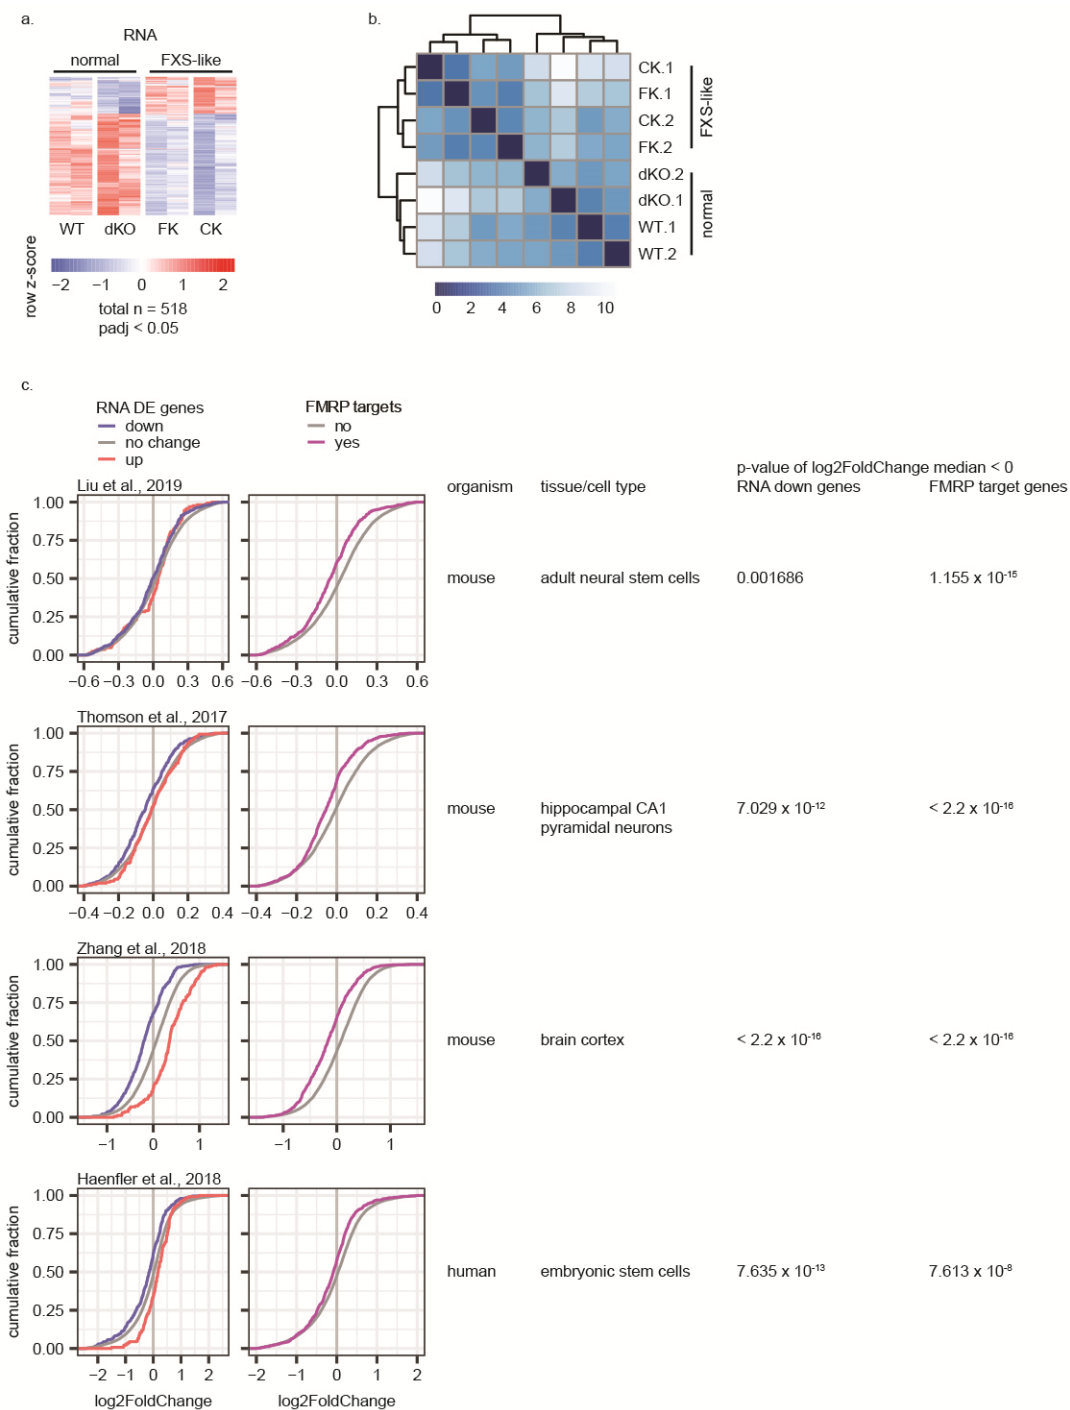

1  
 2 **Figure S1: RNA levels in Fragile X mouse and human models.** a, Heatmap showing DE genes at  
 3 steady state RNA level between any two genotypes of the four genotypes (WT, *Fmr1*-deficient or FK,  
 4 *CPEB1*-deficient or CK, *Fmr1/CPEB1* deficient or dKO). Red and blues shades show high or low z-  
 5 scores for each gene (row) across all samples. Both replicates are plotted separately for each genotype.

## Shu et al, Supplementary Figures

6 **b**, Unsupervised hierarchical clustering of sample to sample distances measured by the Euclidean  
7 distance between each other using their top 1000 most variable genes. Darker to lighter shades of blue  
8 indicate closer to farther distance between samples. Dendrogram represents the clustering. **c**, ECDF  
9 (empirical cumulative distribution function) plots for log<sub>2</sub>FoldChange in published RNA-seq data sets of  
10 various FXS models<sup>18,59–61</sup> for genes up-(red) or down-(blue) regulated at the RNA level identified in this  
11 study (left), and for FMRP binding targets<sup>6</sup> (brown; right). The animal species and tissue/cell typed used  
12 in each of these studies is indicated. P-values were calculated for the log<sub>2</sub>FoldChange values of the  
13 downregulated genes identified in this study (blue) and of the FMRP targets (brown) to be smaller than  
14 0 (Wilcoxon test, lower tail). For data from Thomson et al., 2017<sup>59</sup>, genes were filtered for normalized  
15 counts between 10<sup>2.5</sup> and 10<sup>4.25</sup> as was done in the original publication. For data generated using  
16 human embryonic stem cells<sup>61</sup>, only genes with unique mouse orthologs were considered.

17

## Shu et al, Supplementary Figures

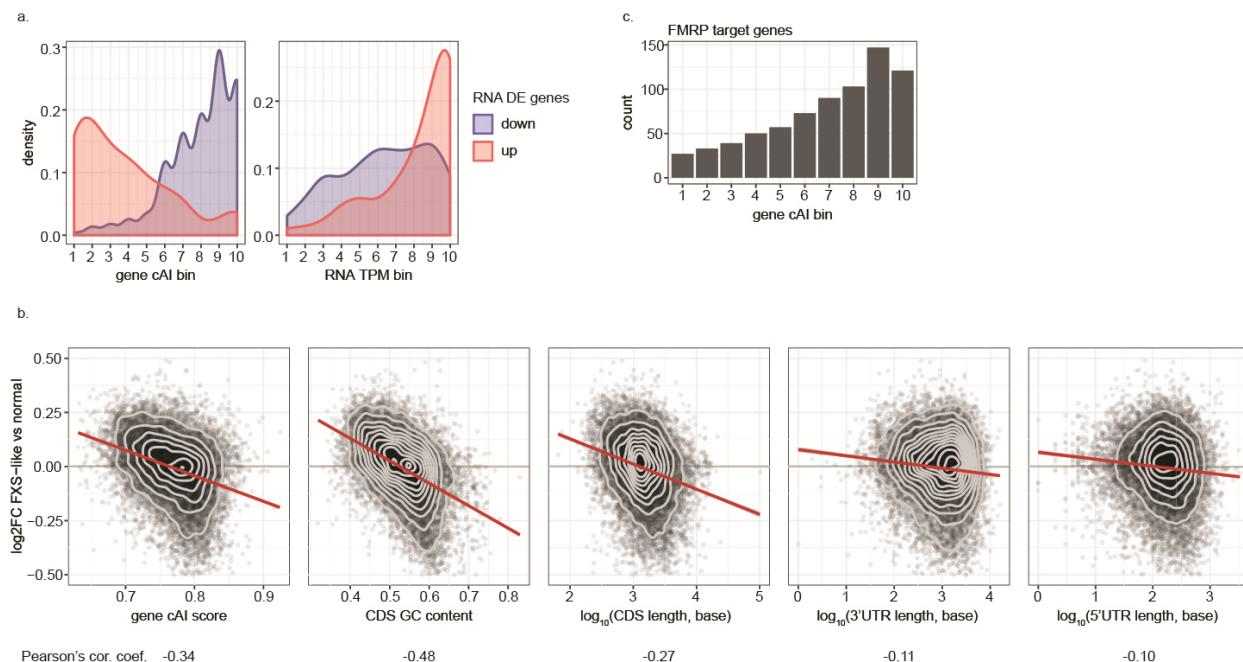

18

19 **Figure S2: RNA changes and codon optimality.** **a**, Density plots of the distribution of genes up- (red)  
20 or down- (blue) regulated at the RNA level in the FXS-like group over gene cAI score bins (left) and  
21 RNA transcript per million (TPM) bins (right). Gene bins were generated by dividing all detectable  
22 protein coding genes into 10 equal bins based on their gene cAI scores (left) or their TPM in WT brain  
23 (right). Bin 1 genes have gene cAI scores or TPMs of the lowest quantile and bin 10 genes of the  
24 highest quantile. **b**, Scatter and 2D density contour plots of RNA log<sub>2</sub>FC in FXS-like vs normal group as  
25 a function of gene cAI scores, CDS GC content, and log<sub>10</sub> of CDS lengths, 3'UTR lengths, and 5'UTR  
26 lengths of all detectable genes. The highest expressed isoform of each gene was selected to calculate  
27 the gene cAI score, CDS GC content, and lengths of each feature. The red straight line shows the  
28 linear regression of the data points. Pearson's product-moment correlation coefficients are indicated. **c**,  
29 Bar graph of count of FMRP target genes in each gene cAI score bin.

30

## Shu et al, Supplementary Figures

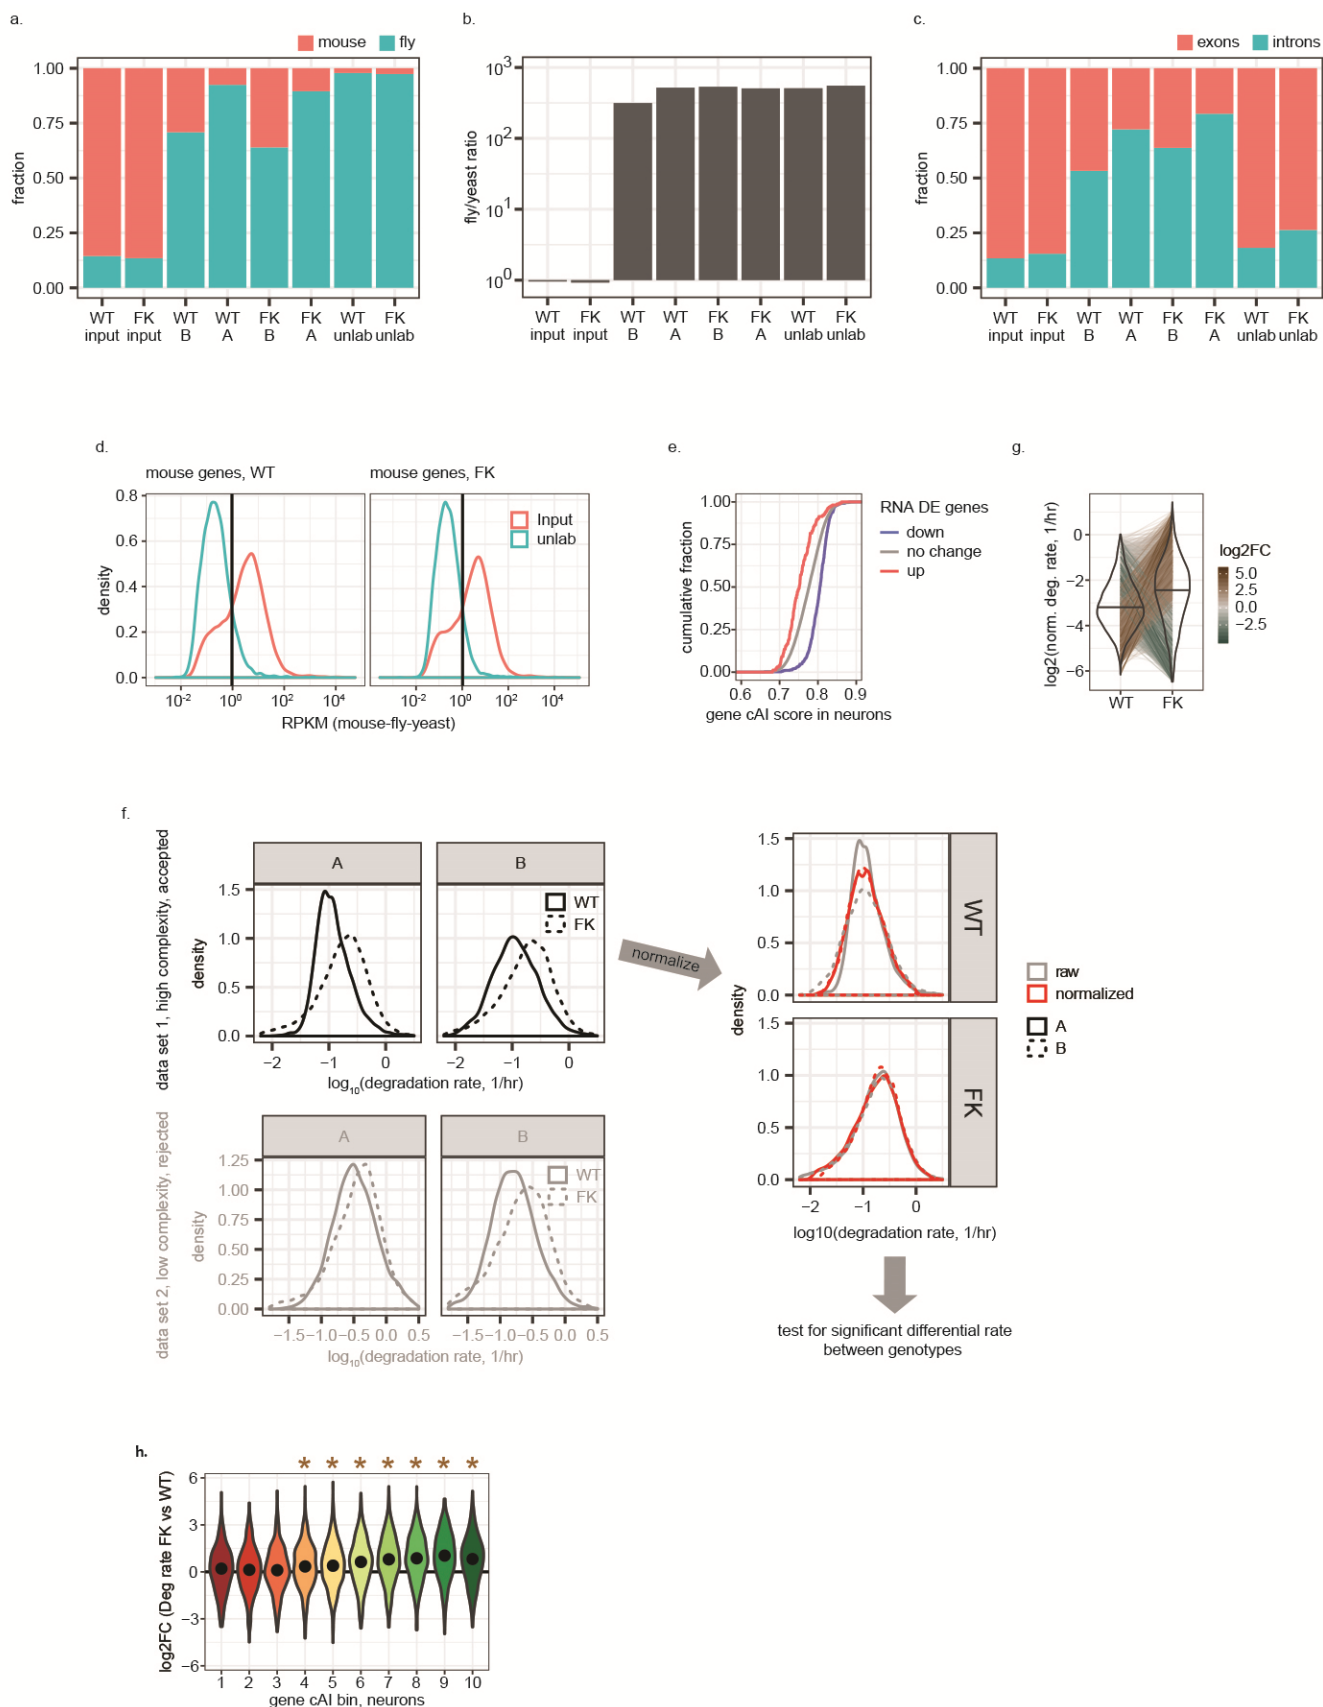

Shu et al, Supplementary Figures

32 **Figure S3: RNA metabolic profiling in WT and FK neurons. a,** Bar graph of fractions of reads  
33 uniquely mapped to mouse (orange) or *Drosophila* (green) transcriptome in each library. As expected,  
34 the pulled-down libraries (A, B and unlab) were enriched in reads mapped to the fly transcriptome (5-  
35 EU labeled to saturation) over that of mouse (5-EU labeled only for a brief pulse). The input libraries  
36 were not subjected to pull-down and had more reads mapped to mouse compared to fly. Unlab libraries  
37 had the smallest ratio of reads that mapped to mouse, demonstrating minimum background to the pull-  
38 down process. Accordingly, libraries from mouse neurons that are labeled for a shorter time (20min,  
39 libraries A) had smaller ratios of reads mapped to mouse transcriptome than that labeled for longer  
40 (60min, libraries B). **b,** Bar graph of ratio of reads that uniquely mapped to *Drosophila* transcriptome vs  
41 that to yeast in each library. Ratios are scaled so that the mean of this ratio in WT input and in FK input  
42 libraries is 1. Similar to panel **a**, the high *Drosophila* to yeast ratio demonstrates specific pull-down to  
43 enrich for 5-EU labeled RNA. **c,** Bar graph of fractions of reads that uniquely mapped to exons (orange)  
44 and introns (green) among those uniquely mapped to the mouse transcriptome. As expected, input  
45 libraries are composed mostly of mature mRNAs and therefore had predominantly exon reads. Similarly,  
46 the exon/intron ratio for unlab libraries represents nonspecific signal that originates from the input RNA  
47 pool. Libraries from mouse neuron RNAs that are labeled for short (20min, A) or longer (60min, B) are  
48 mostly composed of nascent transcripts and therefore had more introns. Accordingly libraries labeled  
49 for a shorter time (A) had more introns than that labeled for longer (B). **d,** Density plots of RPKM (read  
50 per kb per million reads uniquely mapped to mouse-fly-yeast combined genome) of each mouse gene  
51 in input (orange) and unlab (green) libraries in WT (left) and FK (right) neurons. Filtering thresholds  
52 (black vertical lines) were identified for WT and FK at 0.95 and 1.05 RPKM, respectively. Genes were  
53 filtered for those that had RPKM higher than threshold in input (i.e., that are expressed) and lower than  
54 threshold in unlab libraries (i.e., that do not have high nonspecific pull-down background). Data of  
55 genes that survive filtering in both WT and FK libraries are analyzed by the INSPEcT program<sup>30</sup> to  
56 estimate RNA metabolism rates. **e,** ECDF plot of gene cAI scores calculated using WT neuron  
57 transcriptome (input) for DE genes at the RNA level in the FXS-like group, similar to **Fig 2b**. **f,** Pipeline

## Shu et al, Supplementary Figures

58 for normalization and statistical tests for genes with differential RNA metabolic rates, using the  
59 degradation rate as the example that is shown. We observed reproducible global faster degradation  
60 rates in FK than WT in both libraries A and B and in both data set 1 (high quality libraries, presented in  
61 this study) and data set 2 (independent data set, low complexity lacks statistical power and was  
62 rejected for gene-level analysis (gray shaded graphs) but was sufficient for confirming global-level shift)  
63 (left). To capture the global shift between genotypes while testing for genes with significantly different  
64 metabolism (i.e., synthesis, processing, and degradation) rates, we considered library A and B in data  
65 set 1 as pseudo-replicates and normalized them using the Limma package<sup>58</sup> for each genotype  
66 separately. With normalized RNA metabolic rates, genes with significantly different rates between  
67 genotypes were then called (right). **g**, Violin-and-line plot for the means of log<sub>2</sub> of normalized  
68 degradation rates in libraries A and B for all genes with degradation rates inferred by INSPECT<sup>30</sup> in WT  
69 and FK neurons. The black horizontal line in each violin denotes the median. Thin lines span WT and  
70 FK connect the values of the same genes in both genotypes. Brown-grey-green shades of the thin lines  
71 indicate the log<sub>2</sub>FC of the normalized degradation rates of each gene. **h**, Violin plots of log<sub>2</sub>FC of  
72 degradation rates in FK vs WT neurons for genes in each gene cAI score bins calculated using WT  
73 neuronal transcriptome. Brown star indicates the median of the bin greater than 0 with a p-value < 0.01  
74 (Wilcoxon test, one tail). No bin had median less than 0.
